# Supplementary material
Source: PubMed Central journal article supplement (PMC4088962)
Supplement: NIHMS609315-supplement-SD_1.pdf [file NIHMS609315-supplement-SD_1.pdf]

**Figure E1. Attenuation of air outside the body by scanner and time in MESA study.**

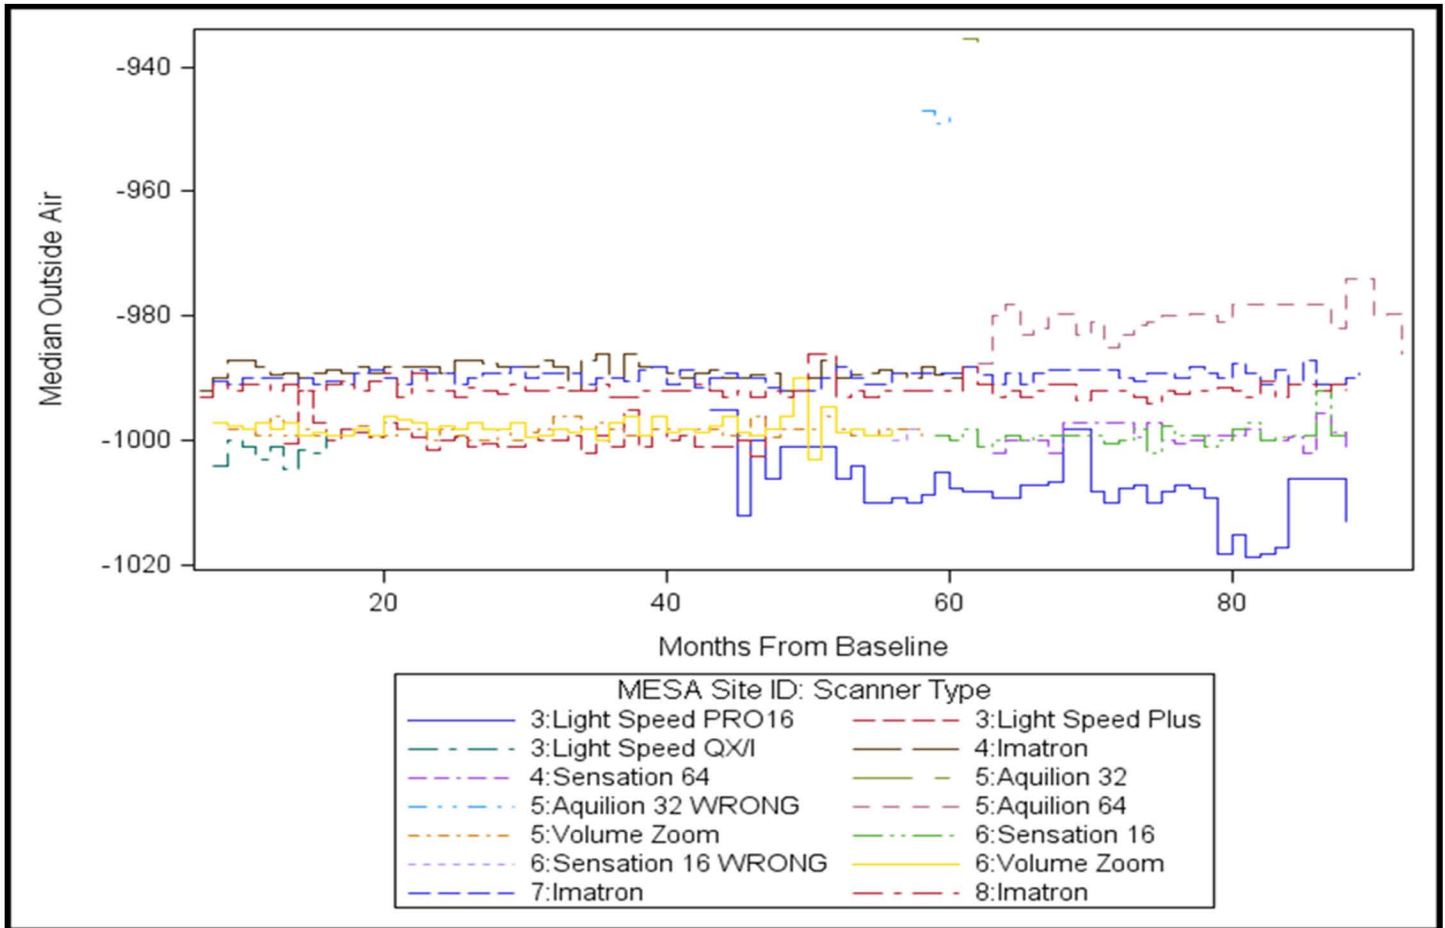

Monthly median attenuation (Hounsfield Units) of air outside the body assessed on each scan over 7 years of follow-up. The median value for each month is plotted against time. Multidetector scanners have an average attenuation of air of -1,000 HU whereas electron beam scanners maintain a stable difference with an average attenuation of -990 HU. The outlier values were all acquired on Toshiba Aquilion scanners (dashed lines departing from average) or a GE Lightspeed Pro 16 scanners (solid blue line departing from average). Exclusion of scans acquired on these scanners increased the precision of results.
