# Supplementary material
Source: PubMed Central journal article supplement (PMC4088962)
Supplement: NIHMS609315-supplement-SD_2.pdf [file NIHMS609315-supplement-SD_2.pdf]

**Table E1. CT Scanners used in the Study and Number of Participants Scanned.**

| Site         | EXAM 1 |                         | EXAM 2 |                         | EXAM 3 |                         | EXAM 4 |                      |
|--------------|--------|-------------------------|--------|-------------------------|--------|-------------------------|--------|----------------------|
|              | n      | Scanner                 | n      | Scanner                 | n      | scanner                 | n      | scanner              |
| WFU          | 91     | GE Light Speed QX/I     | 174    | GE Light Speed Plus     | 370    | GE Light Speed Pro16    | 151    | GE Light Speed Pro16 |
|              | 482    | GE Light Speed Plus     | 12     | GE Light Speed Pro16    |        |                         |        |                      |
| COL          | 710    | Imatron C-150           | 246    | Imatron C-150           | 238    | Imatron C-150           | 185    | Siemens Sensation 64 |
|              |        |                         |        |                         | 173    | Siemens Sensation 64    |        |                      |
| JHU          | 461    | Siemens S4+ Volume Zoom | 108    | Siemens S4+ Volume Zoom | 163    | Siemens S4+ Volume Zoom | 134    | Toshiba Aquilion 64  |
|              |        |                         |        |                         | 27     | Toshiba Aquilion 32     |        |                      |
|              |        |                         |        |                         | 97     | Toshiba Aquilion 64     |        |                      |
| UMN          | 539    | Siemens S4+ Volume Zoom | 139    | Siemens S4+ Volume Zoom | 117    | Siemens S4+ Volume Zoom | 172    | Siemens Sensation 16 |
|              |        |                         |        |                         | 203    | Siemens Sensation 16    |        |                      |
| NWU          | 726    | Imatron C-150           | 230    | Imatron C-150           | 425    | Imatron C-150           | 185    | Imatron C-150        |
| UCLA         | 831    | Imatron C-150           | 323    | Imatron C-150           | 456    | Imatron C-150           | 165    | Imatron C-150        |
| <b>Total</b> | 3840   |                         | 1232   |                         | 2269   |                         | 992    |                      |

WFU= Wake Forest University, COL= Columbia University, JHU= Johns Hopkins University, UMN= University of Minnesota, NWU= Northwestern University, UCLA= University of California, Los Angeles.

**Table E2. CT Scanners Change During Follow-up.**

| <b>Change in Scanner Model during the Follow-Up Period</b> |                  |                     |                      |              |
|------------------------------------------------------------|------------------|---------------------|----------------------|--------------|
|                                                            | <b>No Change</b> | <b>Changed Once</b> | <b>Changed Twice</b> | <b>Total</b> |
| <b>Scanned once</b>                                        | 143              | -                   | -                    | 143          |
| <b>Scanned twice</b>                                       | 1879             | 1022                | -                    | 2901         |
| <b>Scanned thrice</b>                                      | 295              | 481                 | 20                   | 796          |
| <b>Participants (%)</b>                                    | 2317 (60)        | 1503 (39)           | 20 (1)               | 3840 (100)   |

**Table E3. Sensitivity Analysis for the Relationship of Mean Annual Rate of Change in Percent Emphysema to Baseline Plasma Sphingomyelin Level, Stratified by Gender, Race, and Smoking Status.**

|                           | Mean Annual Change in Percent<br>Emphysema per 1 standard deviation<br>increase in baseline SM | 95% Confidence Interval | p-Value |
|---------------------------|------------------------------------------------------------------------------------------------|-------------------------|---------|
| <b>Among Males</b>        | 0.102                                                                                          | (-0.065, 0.268)         | 0.23    |
| <b>Among Females</b>      | 0.124                                                                                          | (0.005, 0.244)          | 0.042   |
| <b>Among White</b>        | 0.140                                                                                          | (-0.031, 0.310)         | 0.11    |
| <b>Among Black</b>        | 0.076                                                                                          | (-0.118, 0.270)         | 0.44    |
| <b>Among Hispanic</b>     | 0.164                                                                                          | (-0.041, 0.368)         | 0.12    |
| <b>Among Chinese</b>      | -0.019                                                                                         | (-0.270, 0.232)         | 0.88    |
| <b>Among Ever smoked</b>  | 0.044                                                                                          | (-0.095, 0.183)         | 0.54    |
| <b>Among Never Smoked</b> | 0.199                                                                                          | (0.058, 0.341)          | 0.006   |

Models were adjusted for age, gender, race, height, weight, BMI, scanner model and protocol, educational attainment, number of cigarettes smoked per day among current smokers, cumulative pack-years, urinary levels of cotinine at baseline exam, family history of emphysema, having asthma before the age of 45, total serum cholesterol, HDL, LDL, triglycerides, intake of lipid lowering agents, systolic and diastolic and blood pressure, and study field center.

**Table E4. Cross-sectional Association of Percent Emphysema and Plasma Sphingomyelin Level (SM).**

|                | SM Q1 | SM Q2 | SM Q3 | SM Q4 | SM Q5 | Mean Difference in<br>Baseline Percent<br>Emphysema per 1<br>standard deviation<br>increase in SM | p-Value |
|----------------|-------|-------|-------|-------|-------|---------------------------------------------------------------------------------------------------|---------|
| <b>Model 1</b> | Ref.  | -0.34 | -0.84 | 0.23  | 0.05  | -0.01<br>(-0.39, 0.37)                                                                            | 0.95    |
| <b>Model 2</b> | Ref.  | -0.40 | -0.94 | 0.02  | 0.02  | 0.04<br>(-0.37, 0.45)                                                                             | 0.84    |

\* Model 1 controlled for age, gender, race, height, weight, BMI, scanner model and protocol.

\*\* Model 2 included model 1 variables and further controlled for educational attainment, smoking status, number of cigarettes smoked per day, cumulative pack-years, urinary levels of cotinine at baseline exam, family history of emphysema, diagnosis of asthma before age of 45, total serum cholesterol, LDL, HDL, serum triglycerides, intake of lipid lowering agents, systolic and diastolic blood pressure, and study field center.

**Table E5. Cross-sectional Association of Spirometry with Plasma Sphingomyelin Level (SM).**

|                                  | SM Q1    | SM Q2    | SM Q3    | SM Q4    | SM Q5    | Mean Change of PFT parameter per 1 standard deviation increase in SM | p-Value |
|----------------------------------|----------|----------|----------|----------|----------|----------------------------------------------------------------------|---------|
| <b>FEV<sub>1</sub>, mL</b>       |          |          |          |          |          |                                                                      |         |
| <b>Mean±SD</b>                   | 2510±748 | 2439±715 | 2399±704 | 2325±744 | 2220±702 | 2380±730                                                             |         |
| <b>Model 1</b>                   | Ref.     | -20      | 14       | 29       | 52       | 25<br>(10, 39)                                                       | 0.001   |
| <b>Model 2</b>                   | Ref.     | -22      | 11       | 21       | 52       | 24<br>(9, 40)                                                        | 0.002   |
| <b>FVC, MI</b>                   |          |          |          |          |          |                                                                      |         |
| <b>Mean±SD</b>                   | 3398±963 | 3254±942 | 3195±917 | 3120±977 | 2957±903 | 3188±952                                                             |         |
| <b>Model 1</b>                   | Ref.     | -59      | -16      | 22       | 29       | 22<br>(4, 39)                                                        | 0.01    |
| <b>Model 2</b>                   | Ref.     | -55      | -12      | 23       | 33       | 24<br>(5, 43)                                                        | 0.012   |
| <b>FEV<sub>1</sub>/FVC ratio</b> |          |          |          |          |          |                                                                      |         |
| <b>Mean±SD</b>                   | 74.2±9.5 | 75.4±8.9 | 75.3±8.1 | 74.7±8.4 | 75.2±8.1 | 75.0±8.6                                                             |         |
| <b>Model 1</b>                   | Ref.     | 0.76     | 0.67     | 0.23     | 0.66     | 0.17<br>(-0.09, 0.42)                                                | 0.21    |
| <b>Model 2</b>                   | Ref.     | 0.62     | 0.51     | -0.08    | 0.58     | 0.11<br>(-0.16, 0.39)                                                | 0.42    |

\* Model 1 controlled for age, gender, race, height, weight, BMI, diagnosis of asthma before age of 45

\*\* Model 2 included model 1 variables and further controlled for educational attainment, smoking status, number of cigarettes smoked per day, cumulative pack-years, urinary levels of cotinine at baseline exam, family history of emphysema, total serum cholesterol, LDL, HDL, serum triglycerides, intake of lipid lowering agents, systolic blood pressure, and study field center.
